# Supplementary material
Source: PubMed Central journal article supplement (PMC8689029)
Supplement: sj-pdf-1-vdi-10.1177_10406387211044192.pdf [file sj-pdf-1-vdi-10.1177_10406387211044192.pdf]

Goosen WJ, et al. Improved detection of *Mycobacterium tuberculosis* and *M. bovis* in African wildlife samples using cationic peptide decontamination and mycobacterial culture supplementation

**Supplemental Table 1.** Mycobacterial culture results for tissue samples collected from 48 African buffaloes (*Syncerus caffer*) sampled from Hluhluwe iMfolozi Park (KwaZulu Natal), a *M. bovis* endemic wildlife park in South Africa.

| Animal | Tissue                     | Conventional Bactec 960 MGIT |            |          |                 | Novel TiKa-MGIT |            |          |                 |
|--------|----------------------------|------------------------------|------------|----------|-----------------|-----------------|------------|----------|-----------------|
|        |                            | MGIT result                  | TTP (d; h) | ZN stain | RD-PCR          | MGIT result     | TTP (d; h) | ZN stain | RD-PCR          |
| 1      | Pooled head LNs            | +                            | 20;13      | +        | <i>M. bovis</i> | NG              | ND         | ND       | ND              |
| 2      | Pooled thoracic LNs        | +                            | 27;03      | +        | <i>M. bovis</i> | +               | 9;18       | +        | <i>M. bovis</i> |
| 3      | Pooled head LNs            | +                            | 54;23      | +        | –               | NG              | ND         | ND       | ND              |
| 4      | Pooled thoracic LNs        | +                            | 46;14      | –        | –               | +               | 11;14      | +        | <i>M. bovis</i> |
| 5      | Prescapular LN lesion      | +                            | 24;18      | +        | –               | +               | 8          | +        | <i>M. bovis</i> |
| 6      | Retro LN lesion            | NG                           | ND         | ND       | ND              | NG              | ND         | ND       | ND              |
| 7      | Pooled head LNs            | NG                           | ND         | ND       | ND              | NG              | ND         | ND       | ND              |
| 8      | Pooled thoracic LNs        | +                            | 14;07      | –        | –               | +               | 13;04      | +        | <i>M. bovis</i> |
| 9      | Tracheobronchial LN lesion | +                            | 30;01      | –        | –               | NG              | ND         | ND       | ND              |
| 10     | Tracheobronchial LN lesion | +                            | 24;00      | –        | –               | +               | 10;17      | +        | <i>M. bovis</i> |
| 11     | Pooled head LNs            | +                            | 25;05      | +        | <i>M. bovis</i> | +               | 1;21       | +        | <i>M. bovis</i> |
| 12     | Pooled thoracic LNs        | +                            | 24;22      | –        | –               | +               | 17;21      | +        | <i>M. bovis</i> |
| 13     | Mediastinal LN lesion      | NG                           | ND         | ND       | ND              | NG              | ND         | ND       | ND              |
| 14     | Lung lesion                | +                            | 15;13      | –        | –               | +               | 8;22       | +        | <i>M. bovis</i> |
| 15     | Tracheobronchial LN lesion | +                            | 48;04      | +        | <i>M. bovis</i> | +               | 5;16       | +        | <i>M. bovis</i> |
| 16     | Parotid LN lesion          | +                            | 12;19      | –        | –               | +               | 11         | +        | <i>M. bovis</i> |
| 17     | Pooled head LNs            | +                            | 43;17      | –        | –               | +               | 12;06      | +        | <i>M. bovis</i> |
| 18     | Pooled thoracic LNs        | NG                           | ND         | ND       | ND              | NG              | ND         | ND       | ND              |
| 19     | Pooled head LNs            | +                            | 13;05      | –        | –               | +               | 10;18      | +        | <i>M. bovis</i> |
| 20     | Pooled thoracic LNs        | +                            | 10;00      | +        | <i>M. bovis</i> | +               | 3;08       | +        | <i>M. bovis</i> |
| 21     | Pooled thoracic LNs        | NG                           | ND         | ND       | ND              | NG              | ND         | ND       | ND              |
| 22     | Pooled thoracic LNs        | NG                           | ND         | ND       | ND              | NG              | ND         | ND       | ND              |
| 23     | Prescapular LN lesion      | +                            | 38;19      | +        | <i>M. bovis</i> | NG              | ND         | ND       | ND              |
| 24     | Pooled thoracic LNs        | NG                           | ND         | ND       | ND              | NG              | ND         | ND       | ND              |

Improved detection of mycobacteria in wildlife using TiKa

|    |                       |    |       |    |                 |    |       |    |                 |
|----|-----------------------|----|-------|----|-----------------|----|-------|----|-----------------|
| 25 | Retro LN lesion       | +  | 32;08 | –  | –               | +  | 14;03 | +  | <i>M. bovis</i> |
| 26 | Pooled thoracic LNs   | +  | 38;01 | –  | –               | +  | 10;19 | +  | <i>M. bovis</i> |
| 27 | Pooled head LNs       | NG | ND    | ND | ND              | NG | ND    | ND | ND              |
| 28 | Pooled thoracic LNs   | +  | 16;09 | +  | <i>M. bovis</i> | NG | ND    | ND | ND              |
| 29 | Pooled head LNs       | +  | 44;16 | +  | <i>M. bovis</i> | +  | 17;07 | +  | <i>M. bovis</i> |
| 30 | Pooled thoracic LNs   | NG | ND    | ND | ND              | NG | ND    | ND | ND              |
| 31 | Pooled head LNs       | +  | 4;13  | –  | –               | +  | 12;01 | +  | <i>M. bovis</i> |
| 32 | Pooled thoracic LNs   | NG | ND    | ND | ND              | NG | ND    | ND | ND              |
| 33 | Mediastinal LN lesion | +  | 6;07  | +  | <i>M. bovis</i> | +  | 6;16  | +  | <i>M. bovis</i> |
| 34 | Pooled head LNs       | NG | ND    | ND | ND              | +  | 10;14 | +  | <i>M. bovis</i> |
| 35 | Pooled thoracic LNs   | +  | 30;05 | –  | –               | NG | ND    | ND | ND              |
| 36 | Pooled thoracic LNs   | +  | 40;01 | –  | –               | NG | ND    | ND | ND              |
| 37 | Pooled head LNs       | +  | 44    | –  | –               | NG | ND    | ND | ND              |
| 38 | Pooled head LNs       | +  | 12    | –  | –               | NG | ND    | ND | ND              |
| 39 | Tonsil LN lesion      | +  | 46;00 | –  | –               | +  | 10;11 | +  | <i>M. bovis</i> |
| 40 | Pooled thoracic LNs   | +  | 46    | –  | –               | NG | ND    | ND | ND              |
| 41 | Pooled thoracic LNs   | +  | 49;02 | –  | –               | NG | ND    | ND | ND              |
| 42 | Pooled thoracic LNs   | +  | 30;08 | –  | –               | +  | 32;22 | +  | <i>M. bovis</i> |
| 43 | Pooled thoracic LNs   | +  | 18;09 | –  | –               | NG | ND    | ND | ND              |
| 44 | Pooled thoracic LNs   | +  | 13;09 | +  | –               | NG | ND    | ND | ND              |
| 45 | Pooled thoracic LNs   | +  | 48;09 | +  | –               | NG | ND    | ND | ND              |
| 46 | Pooled thoracic LNs   | NG | ND    | ND | ND              | NG | ND    | ND | ND              |
| 47 | Pooled thoracic LNs   | NG | ND    | ND | ND              | +  | 18;01 | +  | <i>M. bovis</i> |
| 48 | Pooled thoracic LNs   | +  | 25;09 | +  | <i>M. bovis</i> | +  | 6;01  | +  | <i>M. bovis</i> |

Tissue samples, including head, lung, and peripheral lymph nodes (LNs), were collected from 48 African buffaloes. All samples from each animal were pooled for downstream mycobacterial culture using the Bactec 960 MGIT (Becton Dickinson) and novel TiKa-MGIT (TiKa Diagnostics) method. ND = not done; NG = no growth; RD-PCR = region of difference PCR; TTP = time to positivity; ZN = Ziehl–Neelsen staining; + = positive; – = negative.

**Supplemental Table 2.** Mycobacterial culture results for tissue and respiratory samples with known mycobacterial culture results from 12 white rhinoceros (*Ceratotherium simum*) and 22 African elephants (*Loxodonta africana*) sampled from Kruger National Park, a *M. bovis* endemic wildlife park in South Africa.

| Animal | Species | Sample                     | Conventional MGIT culturing |             |          |                 | Novel TiKa-MGIT |             |          |                 |
|--------|---------|----------------------------|-----------------------------|-------------|----------|-----------------|-----------------|-------------|----------|-----------------|
|        |         |                            | MGIT result                 | TTP (d; hr) | ZN stain | RD-PCR          | MGIT result     | TTP (d; hr) | ZN stain | RD-PCR          |
| 1      | WR      | BALF                       | NG                          | ND          | ND       | ND              | NG              | ND          | ND       | ND              |
| 1      | WR      | Tracheobronchial LN lesion | NG                          | ND          | ND       | ND              | +               | 8;04        | SUS      | <i>M. bovis</i> |
| 1      | WR      | Peripheral LN              | NG                          | ND          | ND       | ND              | +               | 6;11        | +        | <i>M. bovis</i> |
| 1      | WR      | Prescapular LN lesion      | NG                          | ND          | ND       | ND              | NG              | ND          | ND       | ND              |
| 1      | WR      | Pooled head LNs            | NG                          | ND          | ND       | ND              | +               | 7;14        | +        | <i>M. bovis</i> |
| 1      | WR      | Lung LNs                   | NG                          | ND          | ND       | ND              | +               | 7;20        | +        | <i>M. bovis</i> |
| 1      | WR      | Retropharyngeal LN         | NG                          | ND          | ND       | ND              | +               | 14;18       | +        | <i>M. bovis</i> |
| 2      | WR      | Abdominal LNs              | +                           | 32;00       | –        | –               | NG              | ND          | ND       | ND              |
| 2      | WR      | Lung lesion                | +                           | 33;00       | –        | –               | +               | 4;01        | +        | <i>M. bovis</i> |
| 2      | WR      | Peripheral LN              | +                           | 56;00       | –        | –               | NG              | ND          | ND       | ND              |
| 2      | WR      | Thoracic LN                | NG                          | ND          | ND       | ND              | +               | 3;23        | +        | <i>M. bovis</i> |
| 3      | WR      | Head LN                    | +                           | 13;12       | +        | <i>M. bovis</i> | +               | 13;13       | +        | <i>M. bovis</i> |
| 3      | WR      | Abdominal LN               | +                           | 11;20       | +        | <i>M. bovis</i> | +               | 6;0         | +        | <i>M. bovis</i> |
| 3      | WR      | Peripheral LN              | +                           | 19;13       | +        | <i>M. bovis</i> | +               | 4;7         | +        | <i>M. bovis</i> |
| 3      | WR      | Tracheobronchial LN lesion | +                           | 8;15        | +        | <i>M. bovis</i> | +               | 7;9         | +        | <i>M. bovis</i> |
| 3      | WR      | Lung lesion                | +                           | 9;21        | +        | <i>M. bovis</i> | +               | 4;5         | +        | <i>M. bovis</i> |
| 3      | WR      | Mammary gland LN lesion    | +                           | 27;21       | SUS      | –               | +               | 4;7         | +        | <i>M. bovis</i> |
| 4      | WR      | Head LNs                   | NG                          | ND          | ND       | ND              | +               | 5;12        | +        | <i>M. bovis</i> |
| 4      | WR      | Thoracic LNs               | +                           | 7;5         | –        | –               | +               | 18;10       | +        | <i>M. bovis</i> |
| 4      | WR      | Peripheral LNs             | NG                          | ND          | ND       | ND              | +               | 4;13        | +        | <i>M. bovis</i> |
| 4      | WR      | Lung tissue                | +                           | 15;13       | +        | <i>M. bovis</i> | +               | 7;21        | +        | <i>M. bovis</i> |
| 5      | WR      | Lung tissue                | +                           | 4;15        | +        | <i>M. bovis</i> | +               | 9;18        | +        | <i>M. bovis</i> |
| 5      | WR      | Head LNs                   | +                           | 2;15        | +        | <i>M. bovis</i> | +               | 4;7         | +        | <i>M. bovis</i> |

Improved detection of mycobacteria in wildlife using TiKa

|    |    |               |    |       |     |                 |    |       |    |                 |
|----|----|---------------|----|-------|-----|-----------------|----|-------|----|-----------------|
| 5  | WR | Abdominal LN  | +  | 7;2   | -   | -               | NG | ND    | ND | ND              |
| 5  | WR | Peripheral LN | +  | 8;23  | +   | <i>M. bovis</i> | +  | 11;9  | +  | <i>M. bovis</i> |
| 5  | WR | Thoracic LN   | +  | 7;04  | -   | <i>M. bovis</i> | +  | 9;6   | +  | <i>M. bovis</i> |
| 6  | WR | Head LN       | +  | 53;3  | -   | -               | +  | 7;9   | +  | <i>M. bovis</i> |
| 6  | WR | Thoracic LN   | +  | 8;15  | +   | <i>M. bovis</i> | +  | 3;0   | +  | <i>M. bovis</i> |
| 6  | WR | Lung lesion   | +  | 33;19 | +   | <i>M. bovis</i> | +  | 5;12  | +  | <i>M. bovis</i> |
| 6  | WR | Peripheral LN | +  | 9;8   | -   | -               | +  | 8;14  | +  | <i>M. bovis</i> |
| 7  | WR | BALF          | +  | 0;19  | SUS | -               | +  | 4;12  | -  | -               |
| 7  | WR | BALF          | +  | 7;0   | SUS | -               | NG | ND    | ND | ND              |
| 7  | WR | BALF          | +  | 21;3  | -   | -               | NG | ND    | ND | ND              |
| 7  | WR | BALF          | +  | 16;9  | -   | -               | NG | ND    | ND | ND              |
| 7  | WR | BALF          | NG | ND    | ND  | ND              | NG | ND    | ND | ND              |
| 7  | WR | BALF          | NG | ND    | ND  | ND              | NG | ND    | ND | ND              |
| 7  | WR | BALF          | NG | ND    | ND  | ND              | NG | ND    | ND | ND              |
| 8  | WR | BALF          | +  | 0;22  | SUS | -               | NG | ND    | ND | ND              |
| 8  | WR | BALF          | +  | 4;9   | SUS | -               | NG | ND    | ND | ND              |
| 8  | WR | BALF          | +  | 25;10 | -   | -               | NG | ND    | ND | ND              |
| 8  | WR | BALF          | +  | 34;21 | -   | -               | NG | ND    | ND | ND              |
| 8  | WR | BALF          | NG | ND    | ND  | ND              | NG | ND    | ND | ND              |
| 8  | WR | BALF          | +  | 26;12 | +   | -               | +  | 19;2  | -  | -               |
| 8  | WR | BALF          | NG | ND    | ND  | ND              | NG | ND    | ND | ND              |
| 9  | WR | BALF          | +  | 4;9   | SUS | -               | NG | ND    | ND | ND              |
| 9  | WR | BALF          | +  | 29;23 | -   | -               | NG | ND    | ND | ND              |
| 9  | WR | BALF          | +  | 10;22 | SUS | -               | NG | ND    | ND | ND              |
| 9  | WR | BALF          | +  | 3;3   | -   | -               | NG | ND    | ND | ND              |
| 9  | WR | BALF          | NG | ND    | ND  | ND              | NG | ND    | ND | ND              |
| 9  | WR | BALF          | +  | 6;9   | SUS | -               | NG | ND    | ND | ND              |
| 9  | WR | BALF          | NG | ND    | ND  | ND              | +  | 11;19 | -  | -               |
| 9  | WR | BALF          | +  | 2;11  | -   | -               | +  | 9;22  | -  | -               |
| 10 | WR | BALF          | +  | 2;23  | SUS | -               | NG | ND    | ND | ND              |
| 10 | WR | BALF          | +  | 6;17  | SUS | -               | NG | ND    | ND | ND              |
| 10 | WR | BALF          | +  | 9;8   | -   | -               | NG | ND    | ND | ND              |

Improved detection of mycobacteria in wildlife using TiKa

|    |    |                |    |       |     |                        |    |       |    |                        |
|----|----|----------------|----|-------|-----|------------------------|----|-------|----|------------------------|
| 10 | WR | BALF           | NG | ND    | ND  | ND                     | +  | 4;16  | -  | -                      |
| 10 | WR | BALF           | NG | ND    | ND  | ND                     | NG | ND    | ND | ND                     |
| 10 | WR | BALF           | +  | 43;4  | SUS | -                      | NG | ND    | ND | ND                     |
| 10 | WR | BALF           | NG | ND    | ND  | ND                     | NG | ND    | ND | ND                     |
| 11 | WR | BALF           | NG | ND    | ND  | ND                     | +  | 13;20 | -  | -                      |
| 12 | WR | BALF           | +  | 5;11  | SUS | -                      | NG | ND    | ND | ND                     |
| 1  | AE | TW             | +  | 7;11  | +   | -                      | +  | 4;08  | -  | <i>M. tuberculosis</i> |
| 1  | AE | BALF           | +  | 19;14 | +   | <i>M. tuberculosis</i> | +  | 5;11  | -  | <i>M. tuberculosis</i> |
| 1  | AE | ETT            | +  | 12;11 | +   | -                      | +  | 9;23  | +  | <i>M. tuberculosis</i> |
| 1  | AE | Lung tissue    | +  | 6;10  | +   | <i>M. tuberculosis</i> | +  | 3;23  | +  | <i>M. tuberculosis</i> |
| 2  | AE | Head LN        | NG | ND    | ND  | ND                     | +  | 2;21  | -  | <i>M. bovis</i>        |
| 2  | AE | Abdominal LNs  | NG | ND    | ND  | ND                     | NG | ND    | ND | ND                     |
| 2  | AE | Thoracic LNs   | +  | 14;12 | +   | <i>M. bovis</i>        | +  | 3;23  | -  | <i>M. bovis</i>        |
| 2  | AE | Peripheral LNs | NG | ND    | ND  | ND                     | NG | ND    | ND | ND                     |
| 2  | AE | Lung tissue    | +  | 15;14 | +   | -                      | NG | ND    | ND | ND                     |
| 3  | AE | Thoracic LNs   | +  | 15;22 | -   | -                      | +  | 2;13  | -  | -                      |
| 3  | AE | Lung           | +  | 10;0  | -   | -                      | +  | 1;14  | -  | -                      |
| 4  | AE | BALF           | +  | 2;19  | -   | -                      | ND | ND    | ND | ND                     |
| 5  | AE | BALF           | +  | 14;0  | -   | -                      | NG | ND    | ND | ND                     |
| 6  | AE | BALF           | NG | ND    | ND  | ND                     | NG | ND    | ND | ND                     |
| 7  | AE | BALF           | +  | 8;19  | -   | -                      | NG | ND    | ND | ND                     |
| 8  | AE | BALF           | +  | 3;14  | -   | -                      | +  | 20;11 | -  | -                      |
| 9  | AE | BALF           | +  | 5;11  | -   | -                      | NG | ND    | ND | ND                     |
| 10 | AE | BALF           | +  | 7;22  | -   | -                      | NG | ND    | ND | ND                     |
| 11 | AE | BALF           | +  | 3;20  | -   | -                      | NG | ND    | ND | ND                     |
| 12 | AE | BALF           | NG | ND    | ND  | ND                     | NG | ND    | ND | ND                     |
| 13 | AE | BALF           | +  | 13;6  | -   | -                      | NG | ND    | ND | ND                     |
| 14 | AE | BALF           | +  | 6;09  | -   | -                      | NG | ND    | ND | ND                     |
| 15 | AE | BALF           | NG | ND    | ND  | ND                     | NG | ND    | ND | ND                     |
| 16 | AE | BALF           | NG | ND    | ND  | ND                     | NG | ND    | ND | ND                     |
| 17 | AE | BALF           | NG | ND    | ND  | ND                     | NG | ND    | ND | ND                     |
| 18 | AE | BALF           | NG | ND    | ND  | ND                     | NG | ND    | ND | ND                     |

Improved detection of mycobacteria in wildlife using TiKa

|    |    |      |    |       |    |    |    |      |    |    |
|----|----|------|----|-------|----|----|----|------|----|----|
| 19 | AE | BALF | +  | 8;13  | –  | –  | NG | ND   | ND | ND |
| 20 | AE | BALF | NG | ND    | ND | ND | NG | ND   | ND | ND |
| 21 | AE | BALF | NG | ND    | ND | ND | NG | ND   | ND | ND |
| 22 | AE | BALF | +  | 11;15 | –  | –  | NG | ND   | ND | ND |
| 5  | AE | TW   | +  | 15;10 | –  | –  | +  | 3;06 | –  | –  |
| 6  | AE | TW   | +  | 29;10 | –  | –  | NG | ND   | ND | ND |
| 8  | AE | TW   | +  | 5;14  | –  | –  | +  | 6;20 | –  | –  |
| 10 | AE | TW   | NG | ND    | ND | ND | NG | ND   | ND | ND |
| 12 | AE | TW   | +  | 8;18  | –  | –  | NG | ND   | ND | ND |
| 13 | AE | TW   | +  | 18;0  | –  | –  | NG | ND   | ND | ND |
| 14 | AE | TW   | +  | 11;22 | –  | –  | NG | ND   | ND | ND |
| 15 | AE | TW   | +  | 7;17  | –  | –  | NG | ND   | ND | ND |
| 16 | AE | TW   | NG | ND    | ND | ND | NG | ND   | ND | ND |
| 17 | AE | TW   | NG | ND    | ND | ND | NG | ND   | ND | ND |
| 18 | AE | TW   | +  | 3;04  | –  | –  | NG | ND   | ND | ND |
| 19 | AE | TW   | +  | 1;0   | –  | –  | NG | ND   | ND | ND |
| 20 | AE | TW   | +  | 2;06  | –  | –  | NG | ND   | ND | ND |
| 21 | AE | TW   | NG | ND    | ND | ND | NG | ND   | ND | ND |
| 22 | AE | TW   | +  | 2; 15 | –  | –  | NG | ND   | ND | ND |

Tissue samples including head, lung, and peripheral lymph nodes (LNs) and respiratory samples like bronchoalveolar lavage fluid (BALF), trunk washes (TW) and endotracheal tube washes (ETT) were collected from white rhinoceros (WR) and African elephants (AE). Samples from each animal were cultured using the Bactec 960 MGIT (Becton Dickinson) and novel TiKa-MGIT (TiKA Diagnostics) method. ND = not done; NG = no growth; RD-PCR = region of difference PCR; TTP = time to positivity; SUS = suspect; ZN = Ziehl–Neelsen staining; + = positive; – = negative.
